# Supplementary material
Source: PubMed Central journal article supplement (PMC6643688)
Supplement: ao6b00531_si_001.pdf [file ao6b00531_si_001.pdf]

## Supplementary Information

### ***In silico* screening and binding characterization of small molecules towards G-quadruplex structure formed in the promoter region of *c-MYC* oncogene**

Jyotsna Bhat<sup>✉a</sup>, Soma Mondal<sup>✉a</sup>, Pallabi Sengupta<sup>a</sup>, Subhrangsu Chatterjee<sup>a\*</sup>

<sup>a</sup> Department of Biophysics, Bose Institute, P-1/12 CIT Scheme VIIM, Kankurgachi, Kolkata, WB, India.

\***Email:** [subhro\\_c@jcbose.ac.in](mailto:subhro_c@jcbose.ac.in) . <sup>✉</sup> These authors have contributed equally

### **Table of Contents**

|                                                                                                                                               |            |
|-----------------------------------------------------------------------------------------------------------------------------------------------|------------|
| 1) Binding conformation of ligands at 5' end of Pu27                                                                                          | Figure S1  |
| 2) ADME properties predicted by QikProp and Docking Score selected molecules after virtual screening                                          | Table S1   |
| 3) Hydrogen bond analysis                                                                                                                     | Figure S2  |
| 4) Schematic representation of topological arrangement of <i>Pu27</i> and intra-molecular hydrogen bonding interactions in quadruplex region  | Figure S3  |
| 5) Water grid density map and Ion grid of <i>Pu27</i> in different complexation state                                                         | Figure S4  |
| 6) 'Cumulative % contribution of each eigenvector' derived from PCA analysis                                                                  | Figure S5  |
| 7) Porcupine plots of unbound- <i>Pu27</i>                                                                                                    | Figure S6  |
| 8) Porcupine plots of <i>Pu27</i> -TPP complex                                                                                                | Figure S7  |
| 9) Porcupine plots of <i>Pu27</i> -RJC complex                                                                                                | Figure S8  |
| 10) Porcupine plots of <i>Pu27</i> -AWO complex                                                                                               | Figure S9  |
| 11) Lindemann's coefficient of <i>unbound</i> - <i>Pu27</i> , <i>Pu27</i> -TPP complex, <i>Pu27</i> -RJC complex and <i>Pu27</i> -AWO complex | Figure S10 |
| 12) CD Melting experiments of <i>Pu27</i> and <i>Pu27</i> -TPP complex                                                                        | Figure S11 |
| 13) one dimensional proton NMR spectroscopy <i>Pu24</i> and <i>Pu24</i> -TPP complex                                                          | Figure S12 |
| 14) Change in one dimensional <sup>31</sup> P NMR spectra of <i>Pu24</i> and <i>Pu24</i> -TPP complex                                         | Figure S13 |
| 15) MTT-assay in T47D and NKE cell line upon treatment with TPP                                                                               | Figure S14 |
| 16) Positive and negative controls of Flow cytometric analysis                                                                                | Figure S15 |
| 17) Gate of Flow cytometry                                                                                                                    | Figure S16 |
| 18) Flow cytometric analysis in NKE cell line upon TPP treatment                                                                              | Figure S17 |

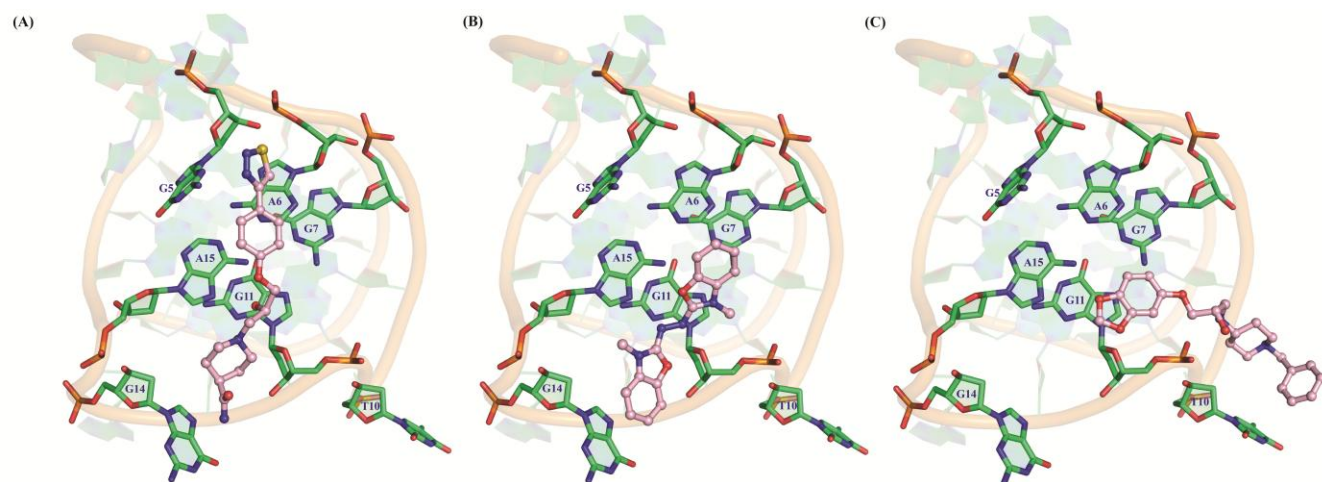

**Figure S1:** Binding conformation of ligands at 5' end of Pu27, (A) docked pose of TPP, (B) docked pose of RJC, (C) docked pose of AWO.

---

**Table S1.** \*ADME properties predicted by QikProp and Docking Score selected molecules after virtual screening

| SN. No              | S | MW      | QLogP<br>o/w | Q<br>LogS | Q<br>PPCaco | Q<br>LogBB | PHOA   | RO5 | Glide<br>Dock Score |
|---------------------|---|---------|--------------|-----------|-------------|------------|--------|-----|---------------------|
| Chelerythrine (CHE) | 2 | 349.385 | 4.591        | -4.969    | 9514.447    | 0.426      | 100    | 0   | -5.259              |
| TPP                 | 0 | 362.446 | 0.548        | -2.062    | 24.929      | -1.219     | 55.151 | 0   | -7.022              |
| RJC                 | 1 | 296.328 | 4.023        | -4.787    | 5272.44     | 0.104      | 100    | 0   | -7.698              |
| AWO                 | 0 | 384.474 | 2.632        | -1.984    | 208.022     | 0.316      | 83.845 | 0   | -7.040              |

SN No.= Supernatural drug database ID

S (STARS) = Number of property/descriptor values falling outside the 95% range of similar values for known drugs. Recommended value 0-5.

MW = Molecular weight

QLogPo/w = Predicted octanol / water partition coefficient. Recommended values -2.0 – 6.5.

QLogS = Predicted aqueous solubility, log S. Recommended values -6.5 – 0.5.

QPPCaco = Predicted apparent Caco-2 cell permeability in nm/sec. Recommended values <25 poor, >500 great.

QLogBB = Predicted brain/blood partition coefficient. Recommended values -3.0 – 1.2.

PHOA= Predicted human oral absorption on 0 to 100% scale. Recommended values >80% is high <25% is poor

RO5= Rule of Five, The rules are: mol\_MW < 500, QLogPo/w < 5, donorHB ≤ 5, and acceptHB ≤ 10.

\* The scores given are approximate values as predicted by the software and not measured experimentally.

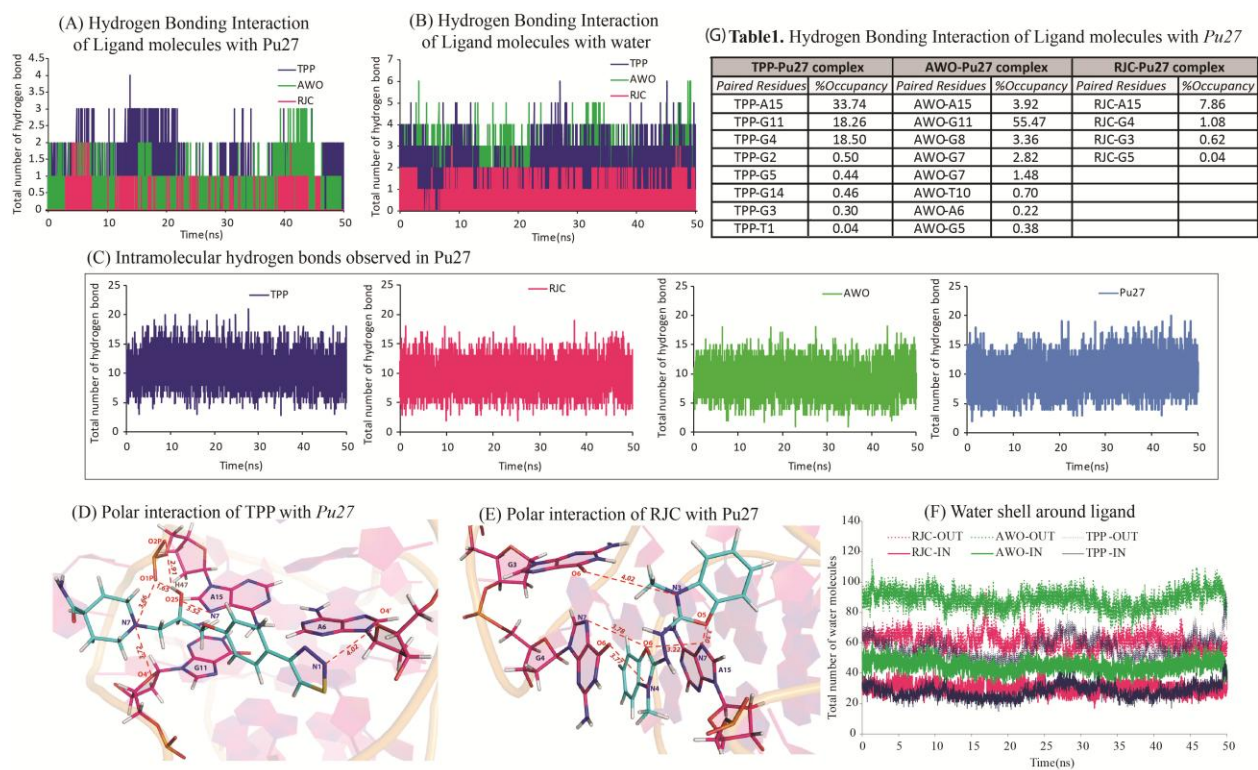

**Figure S2:** Hydrogen bond analysis [color key: unbound-Pu27 (sky blue), Pu27-TPP complex (dark blue), Pu27-RJC complex (pink), Pu27-AWO complex (green)], (A) hydrogen bonding interactions among ligand molecules and Pu27, (B) hydrogen bonding interactions among ligand molecules and surrounding water molecules, (C) intra-molecular hydrogen bonding interactions in quadruplex region, (D) polar interactions between TPP and nucleotide bases sustained in last 1ns simulation period, (E) polar interactions between RJC and nucleotide bases sustained in last 1ns simulation period, (F) water shell analysis around respective ligand, (G) **Table 1**, enlisting occupancy of pair-wise hydrogen bonding interactions in Pu27-ligand complex systems.

**Table S2.** Intra-molecular hydrogen bond interactions of Pu27 in various binding conditions

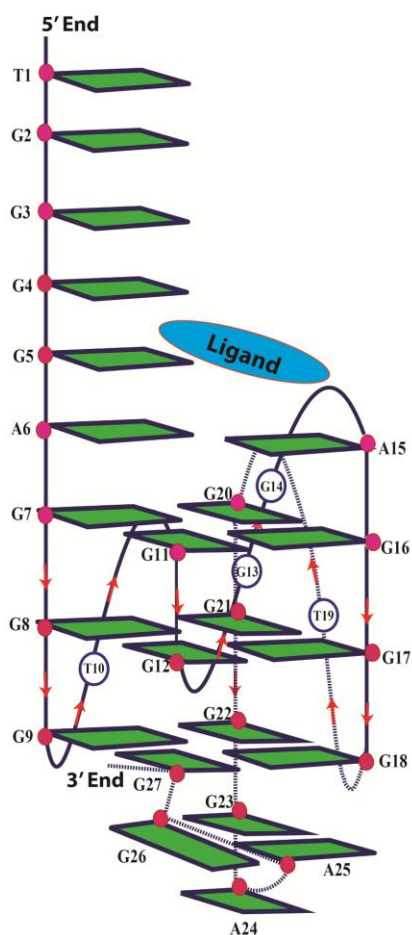

| Paired Residue | TPP-Pu27complex | AWO-Pu27complex | RJC-Pu27complex | Pu27  |
|----------------|-----------------|-----------------|-----------------|-------|
| T1-G8          | 0.00            | 0.00            | 3.24            | 0.00  |
| G2-G3          | 31.5            | 0.02            | 0.82            | 0.02  |
| G2-G4          | 16.86           | 0.00            | 0.66            | 0.02  |
| G2-G5          | 0.00            | 0.00            | 6.42            | 0.00  |
| G3-G4          | 0.00            | 0.00            | 0.00            | 25.68 |
| G3-G5          | 0.00            | 0.04            | 7.20            | 0.00  |
| G4-A15         | 54.98           | 0.02            | 0.02            | 0.40  |
| A6-A15         | 69.02           | 20.26           | 23.54           | 69.14 |
| G7-G20         | 71.14           | 30.89           | 70.91           | 76.42 |
| G7-G11         | 52.04           | 67.71           | 63.77           | 62.12 |
| G11-G16        | 68.06           | 64.43           | 70.11           | 67.44 |
| G16-G20        | 73.58           | 66.67           | 70.77           | 64.78 |
| G8-G12         | 54.02           | 37.83           | 55.37           | 41.7  |
| G8-G21         | 55.58           | 34.23           | 57.11           | 52.14 |
| G12-G17        | 51.82           | 36.93           | 45.15           | 49.56 |
| G17-G21        | 46.2            | 27.71           | 55.05           | 47.5  |
| G9-G22         | 67.08           | 64.61           | 67.03           | 67.82 |

[1] 5' end Overhang [2] A-A mismatch [3] First G-stack [4] Second G-stack [5] Third G-stack

**Figure S3:** Schematic representation of topological arrangement of *Pu27* and Table S2, enlists occupancy of pair-wise intra-molecular hydrogen bonding interactions in quadruplex region.

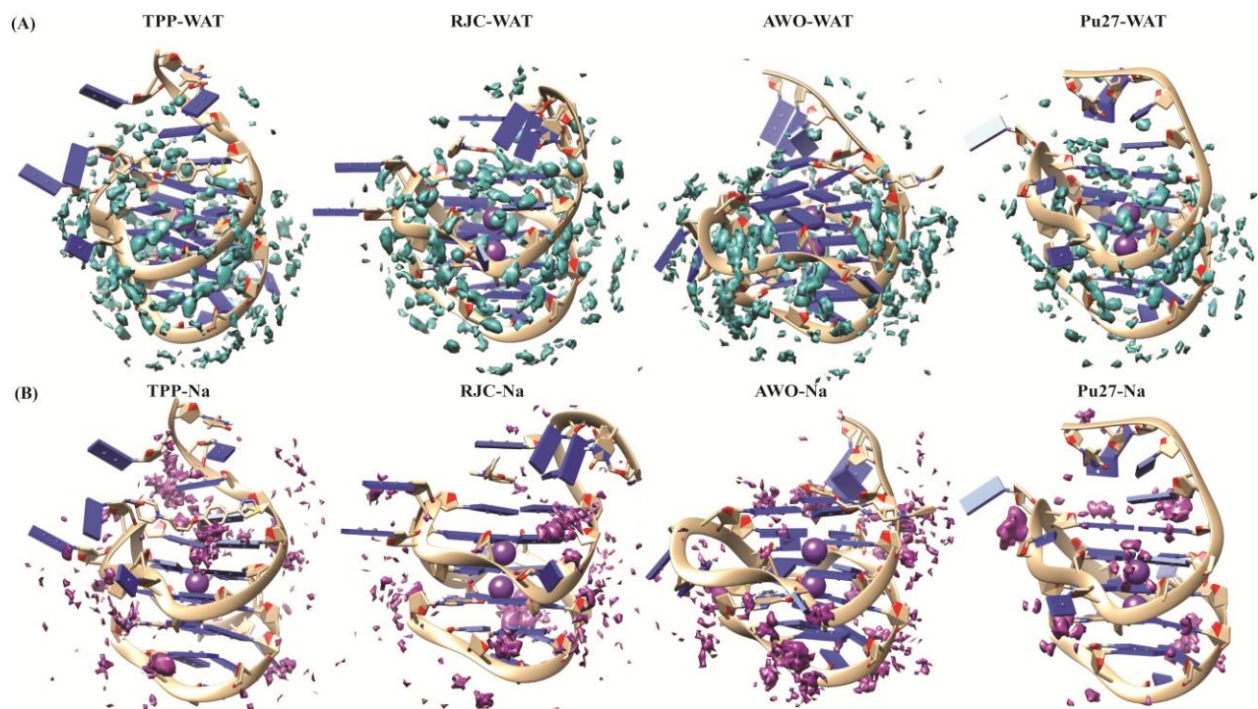

**Figure S4:** (A) Water grid density map of *Pu27* in different complexation states, (B) Ion grid density map of *Pu27* in different complexation states.

---

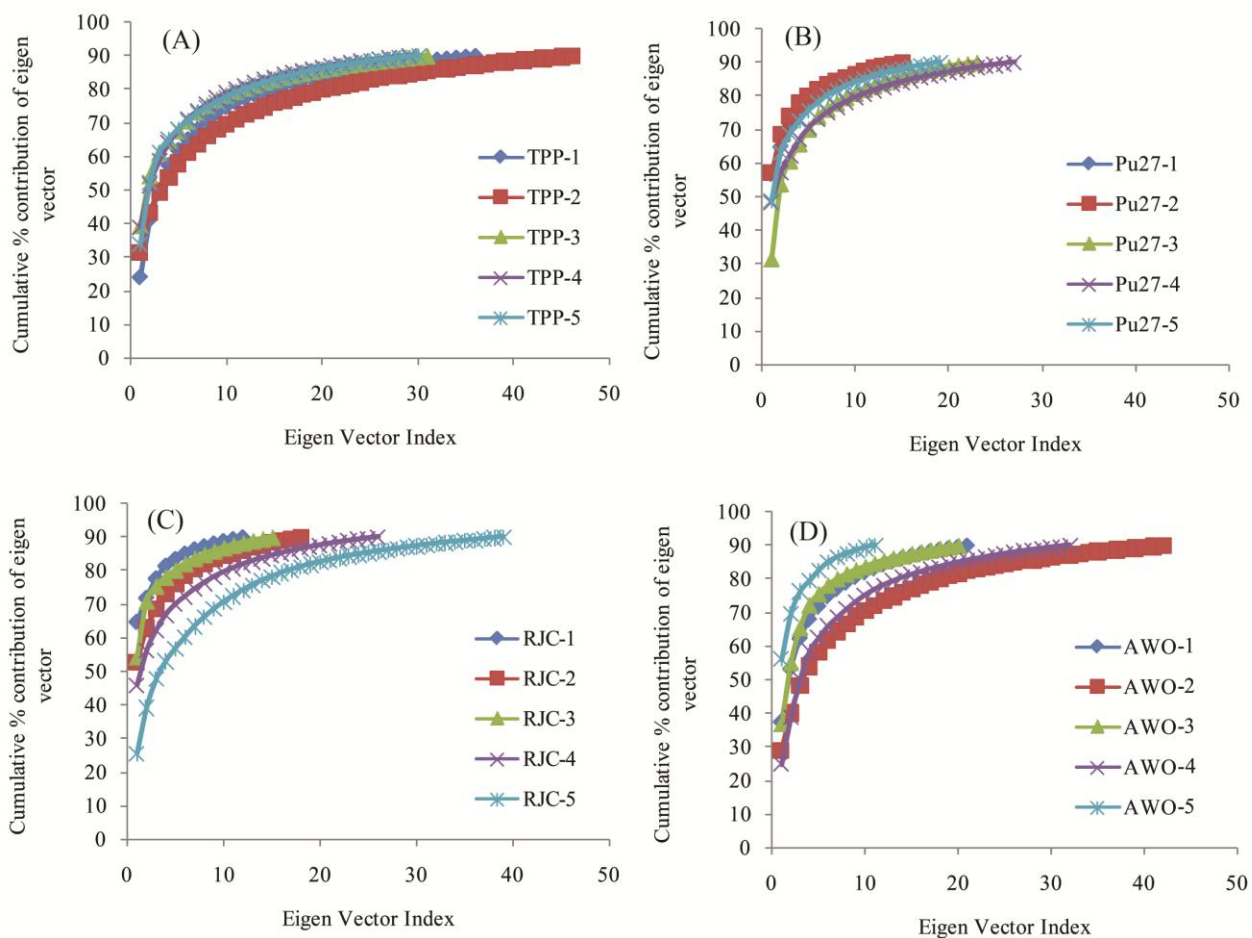

**Figure S5:** ‘Cumulative % contribution of each eigenvector’ for each trajectory derived from PCA analysis of (A) *Pu27*-TPP complex (B) unbound-*Pu27*, (C) *Pu27*-RJC complex and, (D) *Pu27*-AWO complex. 1: 0–10 ns, 2: 11–20 ns, 3: 21–30 ns, 4: 31–40 ns, 5: 41–50 ns time frames of each system are plotted.

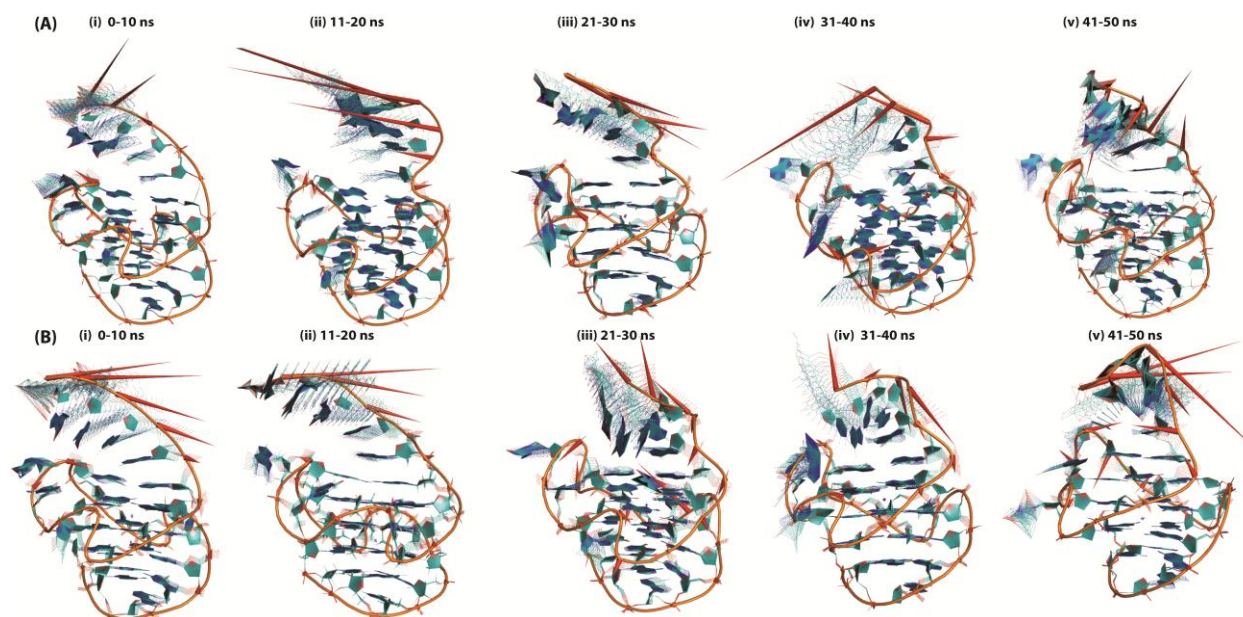

**Figure S6:** Porcupine plots of first (A) and second eigenvectors (B) of unbound-*Pu27*. Time frames are mentioned for respective plots. Blue color is for quadruplex structure (images are prepared in PyMOL).

---



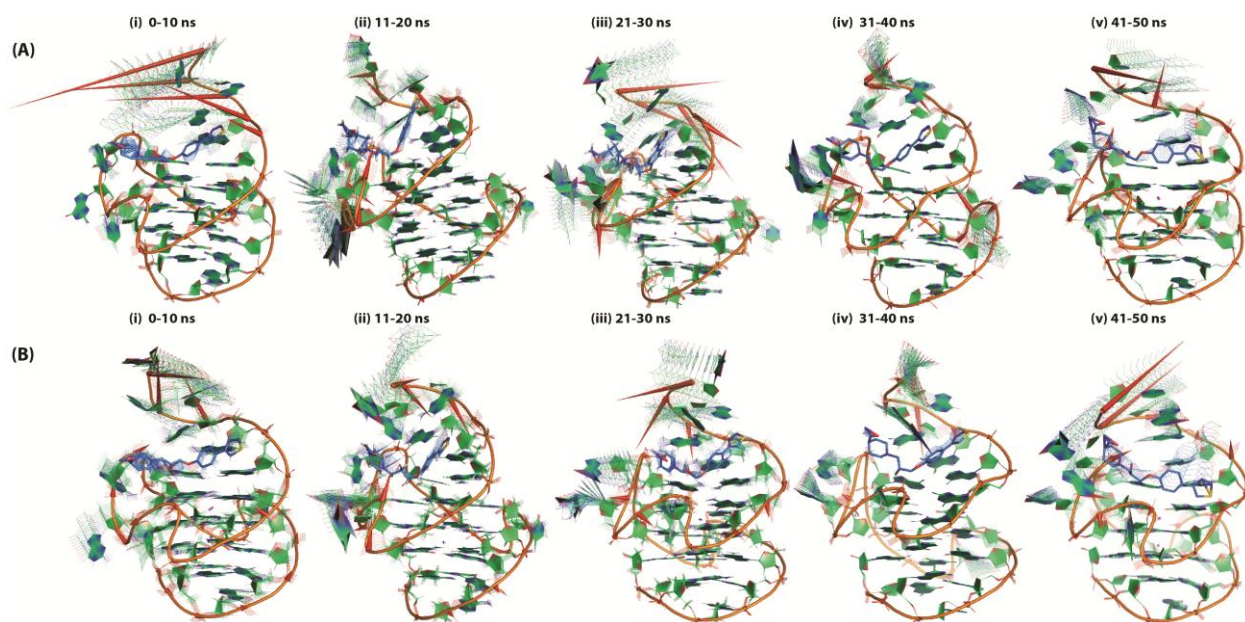

**Figure S7:** Porcupine plots of first (A) and second eigenvectors (B) of *Pu27*-TPP complex. Time frames are mentioned for respective plots. Green color is for quadruplex structure and blue color is for TPP molecule (images are prepared in PyMOL).

---

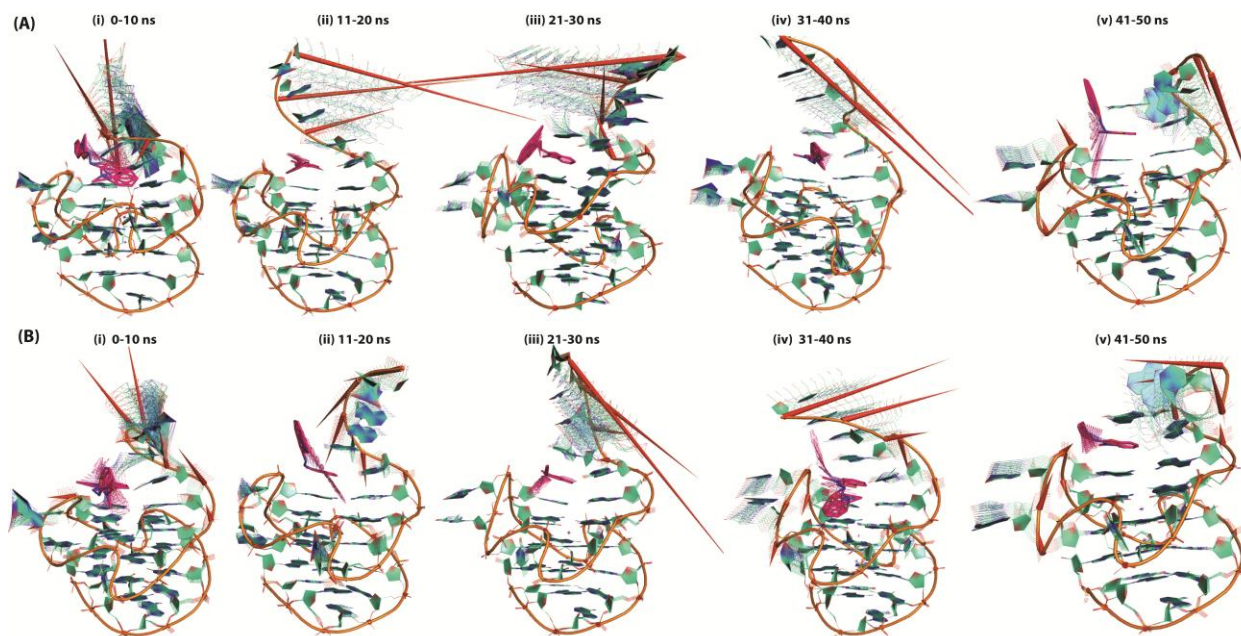

**Figure S8:** Porcupine plots of first (A) and second eigenvectors (B) of Pu27-RJC complex. Time frames are mentioned for respective plots. Green color is for quadruplex structure and magenta color is for RJC molecule (images are prepared in PyMOL).

---

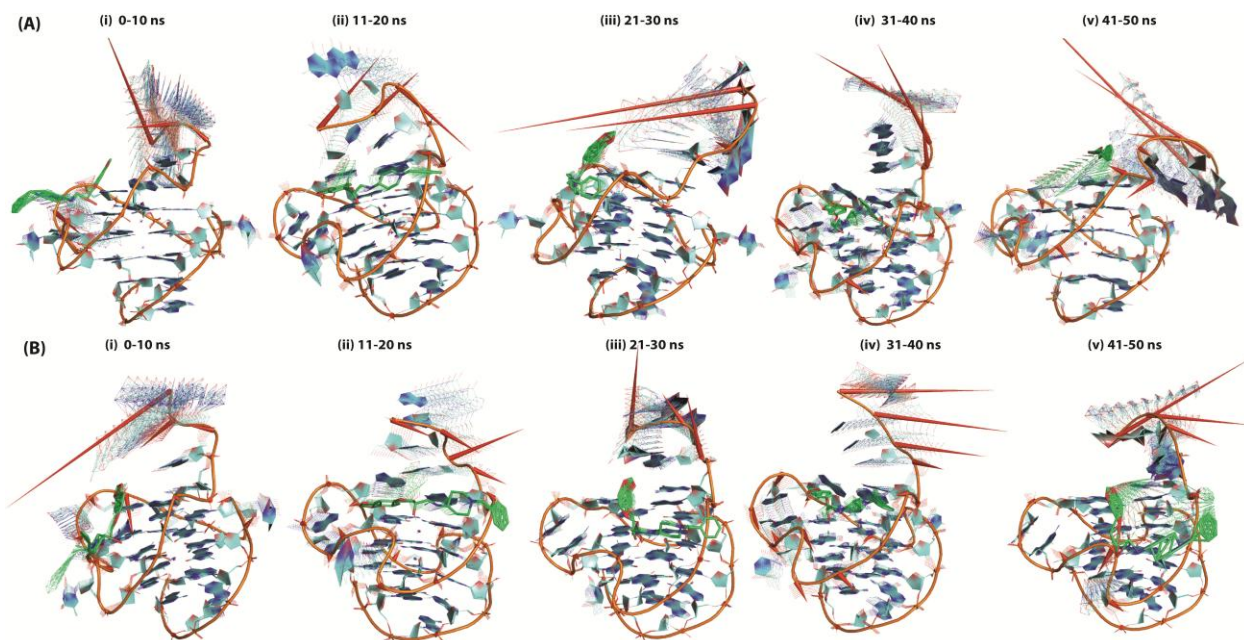

**Figure S9:** Porcupine plots of first (A) and second eigenvectors (B) of Pu27-AWO complex. Time frames are mentioned for respective plots. Blue color is for quadruplex structure and green color is for AWO molecule (images are prepared in PyMOL).

---

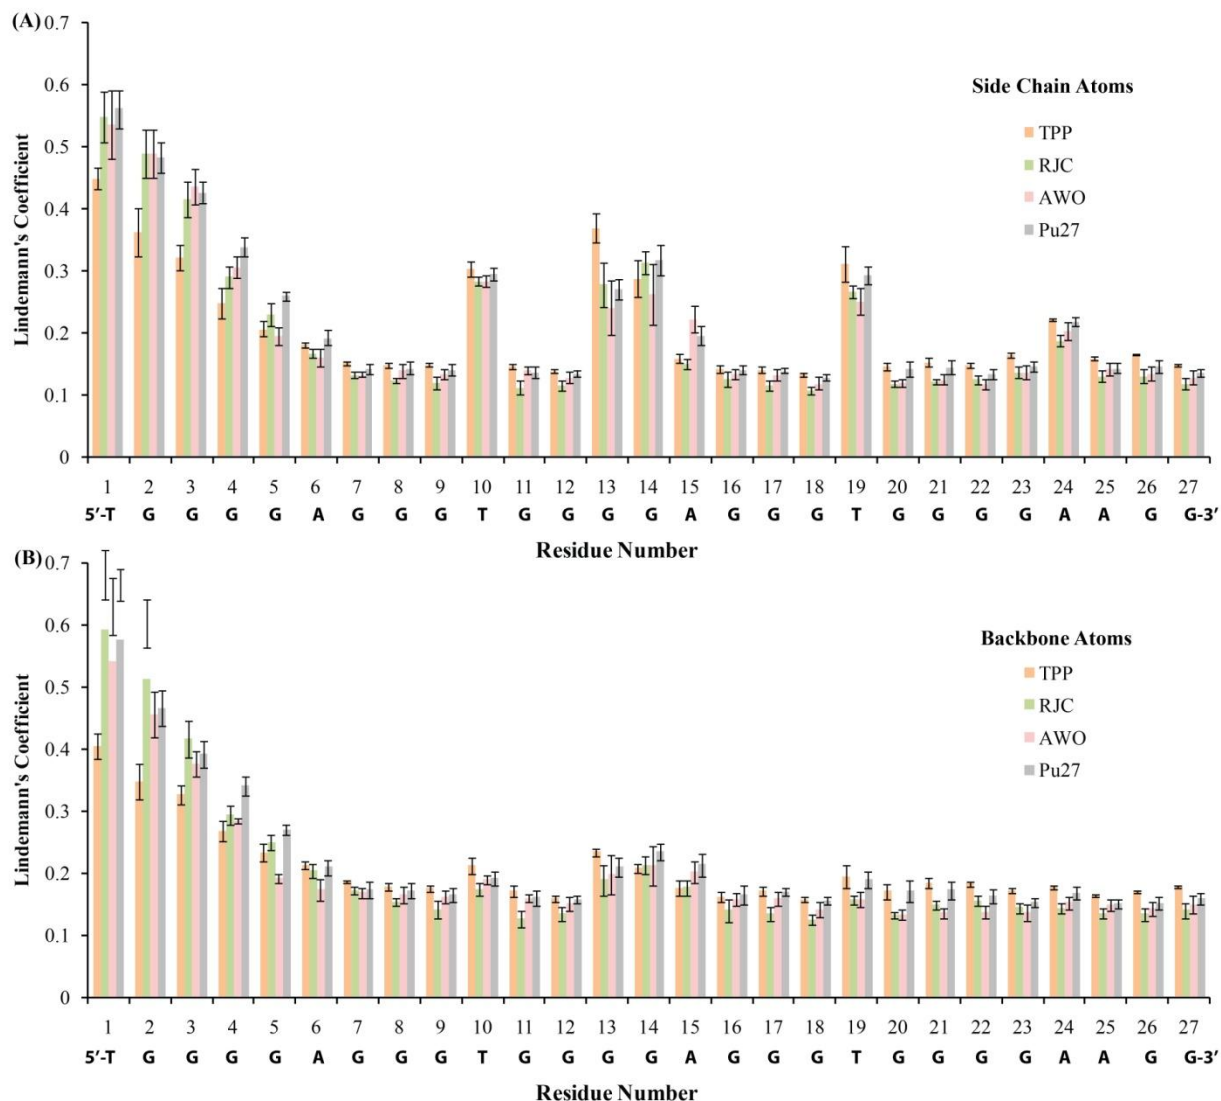

**Figure S10:** Lindemann's coefficient per residues is determined for clustered trajectories of *unbound*-Pu27, *Pu27*-TPP complex, *Pu27*-RJC complex and *Pu27*-AWO complex. Coefficients are calculated for all the five trajectories separately and average is plotted along with the standard error bars. Value < 0.15 indicates solid nature of residue whereas value > 0.15 indicates liquid nature. (A) Lindemann's coefficient calculated for side chain atoms of each residue, (B) Lindemann's coefficient calculated for backbone atoms of each residue.

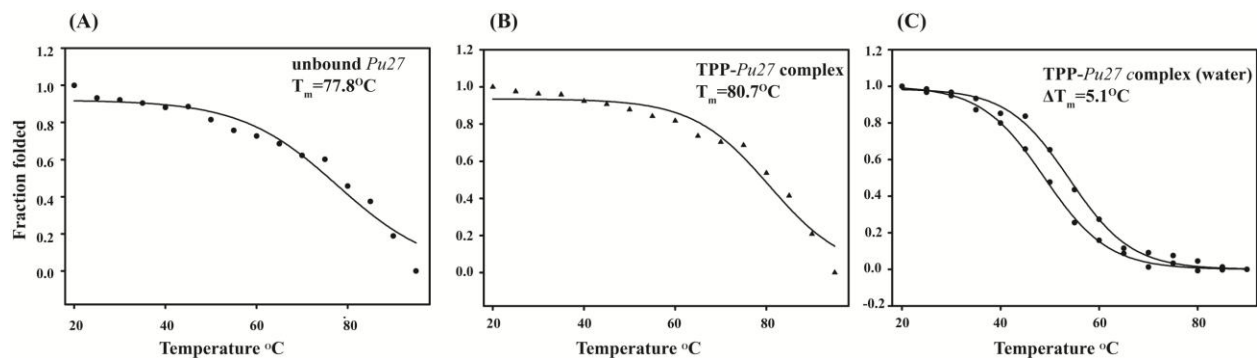

**Figure S11:** CD Melting experiments of *Pu27* and *Pu27-TPP* complex (A) Melting of unbound-*Pu27* 20 $\mu\text{M}$  in 10 mM Phosphate buffer, containing 100 mM KCl, pH 7.0. (B) Melting of *Pu27-TPP* complex (1:3) in 10 mM Phosphate buffer, containing 100 mM KCl, pH 7.0.(C) Melting of unbound-*Pu27* and *Pu27-TPP* complex, when the samples were annealed in water containing  $\text{KCl} < 1.5 \text{ mM}$ .

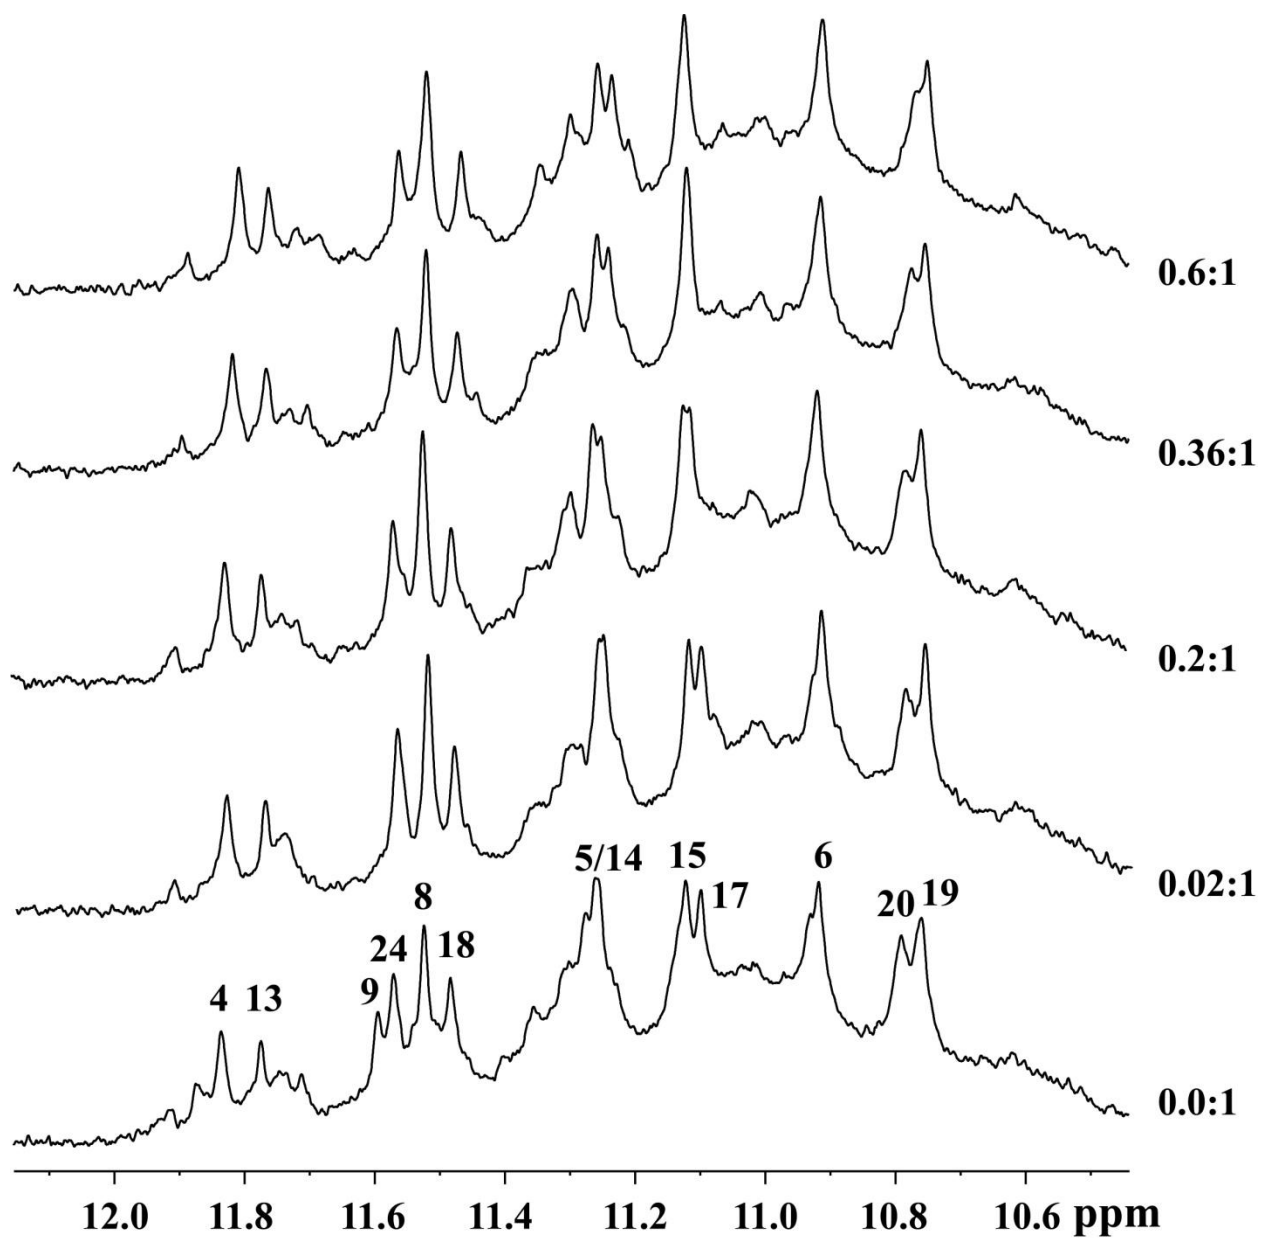

**Figure S12:** NMR spectra showing the changes in imino region of *Pu24* when titrated with increasing concentration of TPP using one dimensional proton NMR spectroscopy. (Concentration ratio mentioned is for TPP:*Pu24*)

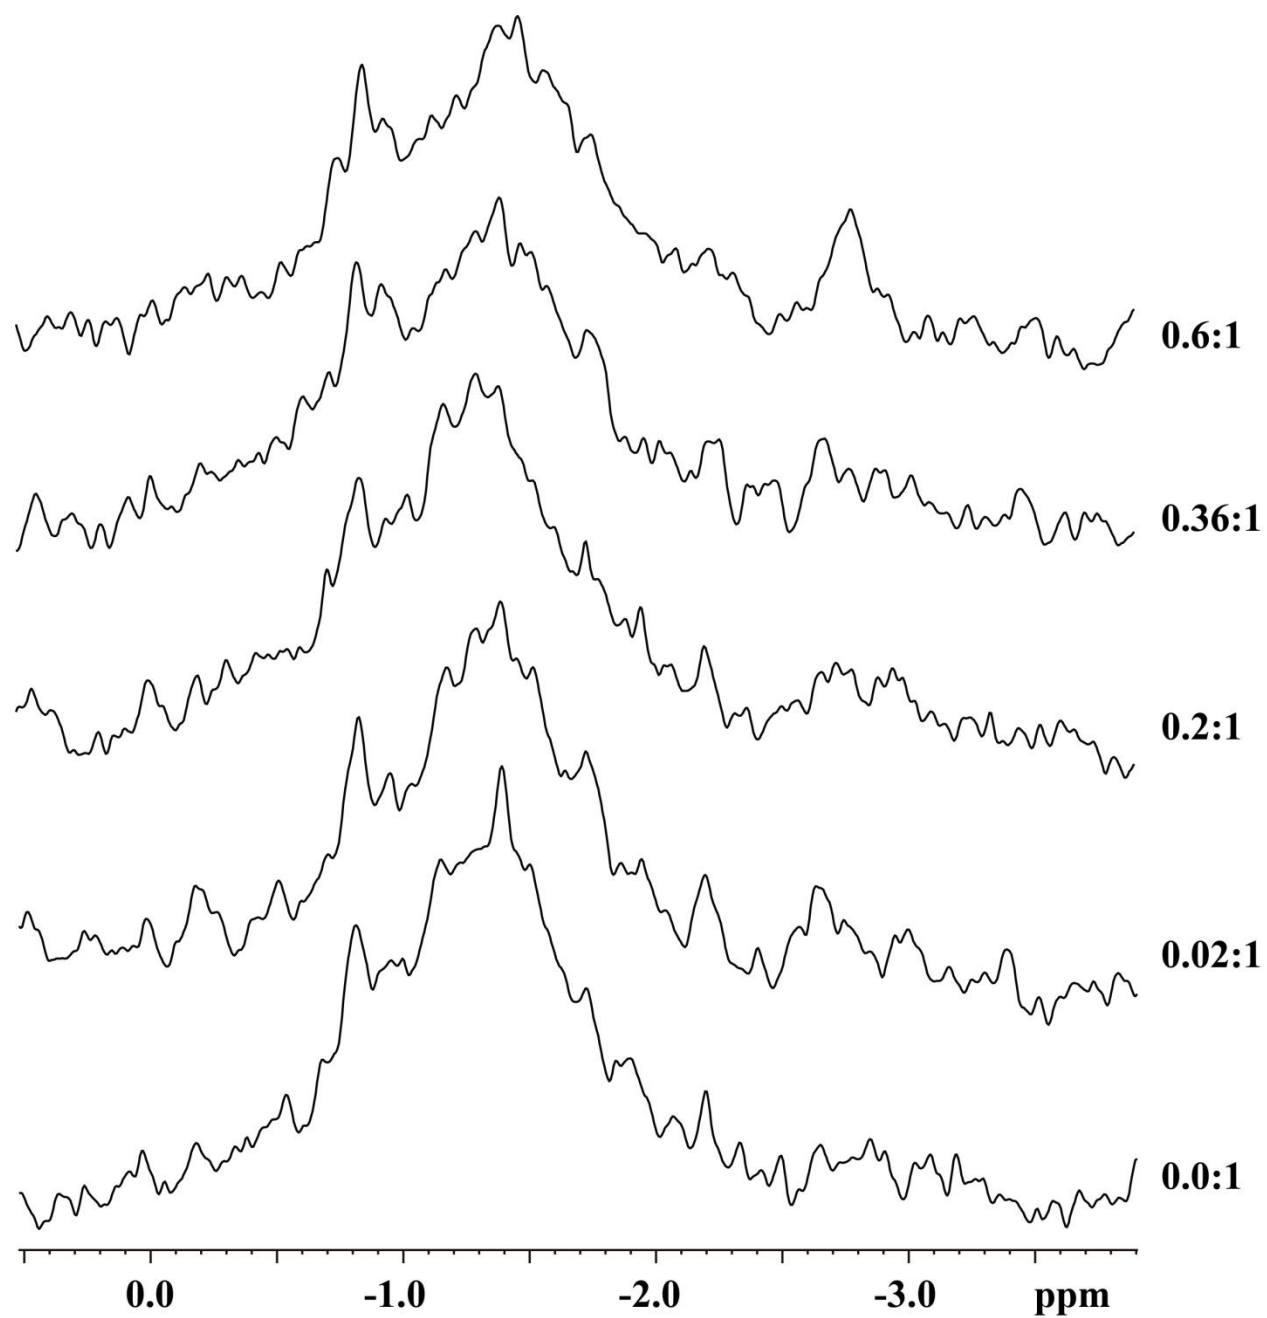

**Figure S13:** Change in one dimensional  $^{31}\text{P}$  NMR spectra of  $\text{Pu24}$  with the increasing concentration of TPP. (Concentration ratio mentioned is for TPP: $\text{Pu24}$ )

---

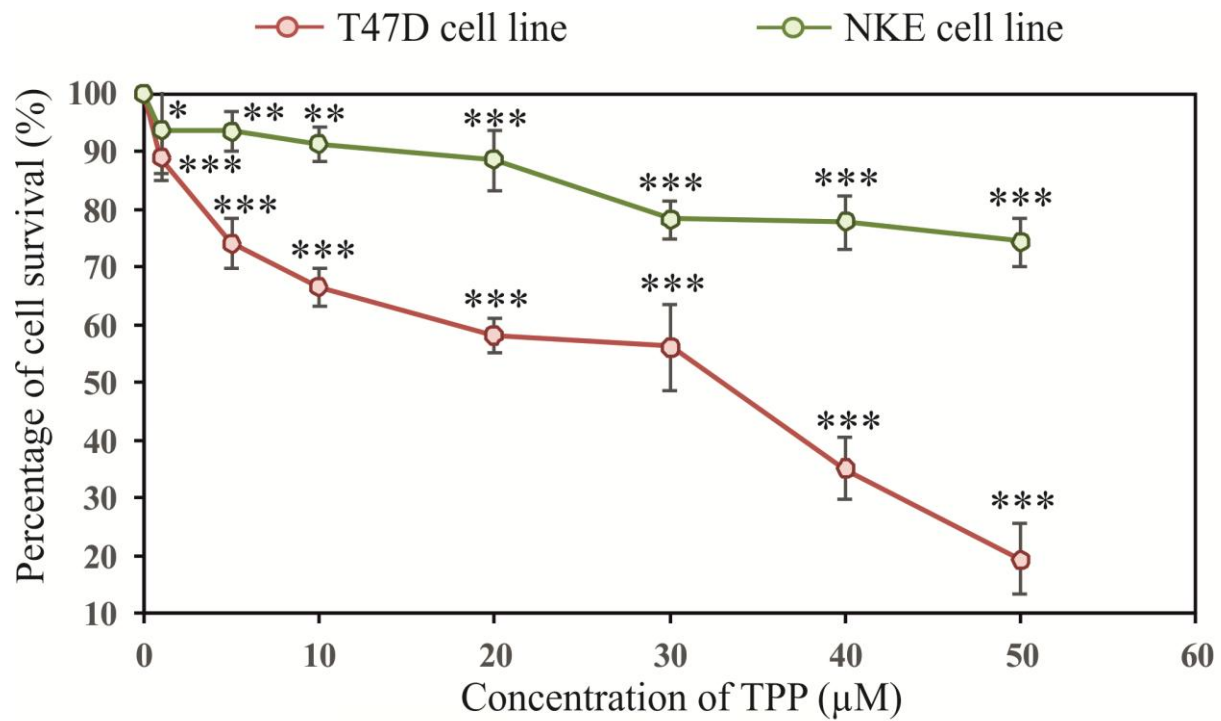

**Figure S14:** Percentage of survival (%) in T47D and NKE cells at increasing TPP concentration for 24 hours. Error bars in the dot plot represent means  $\pm$  s.d. from six independent experiments in triplicate. Asterisks (\*) indicated statistical significance as determined from Student's t-test compared with that of untreated cells (\* indicates  $P < 0.05$ , \*\* indicates  $P < 0.01$ , \*\*\* indicates  $P < 0.001$ ).



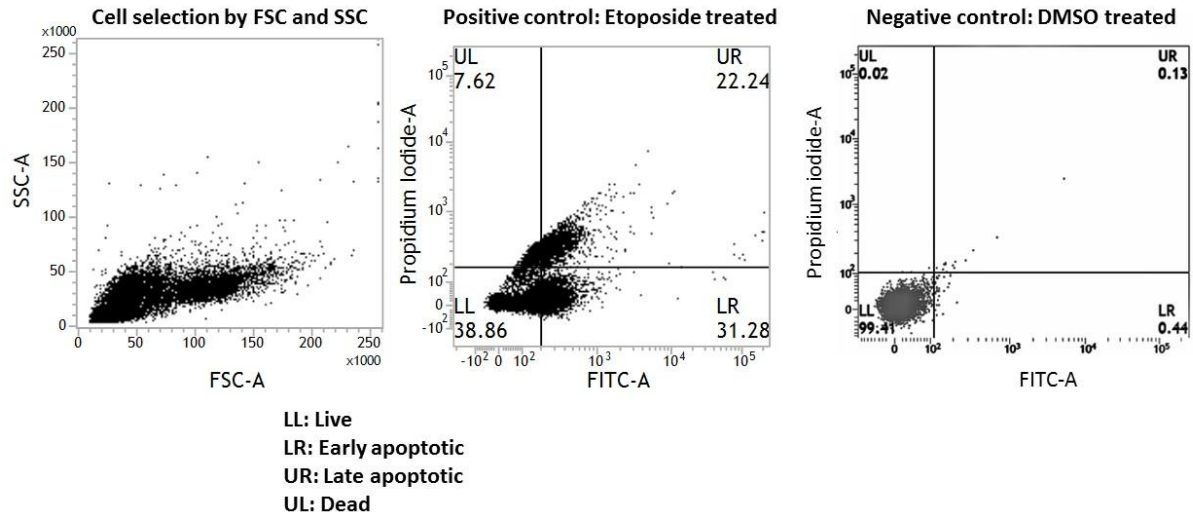

**Figure S15:** Positive and negative controls of Flow cytometric analysis, (A) T47D breast cancer cells are gated based on the FSC (Forward scatter) and SSC (Side scatter). (B) Positive control for flow cytometric analysis is carried out by treating cells with Etoposide. (C) Negative control is performed using DMSO treated T47D cells as TPP is dissolved into DMSO. LL (Lower left), UL (Upper left), UR (Upper right), and LR (Lower right) in the four quadrants represent Live, dead, or necrotic and early apoptotic stages of the cells upon Etoposide and DMSO treatment.

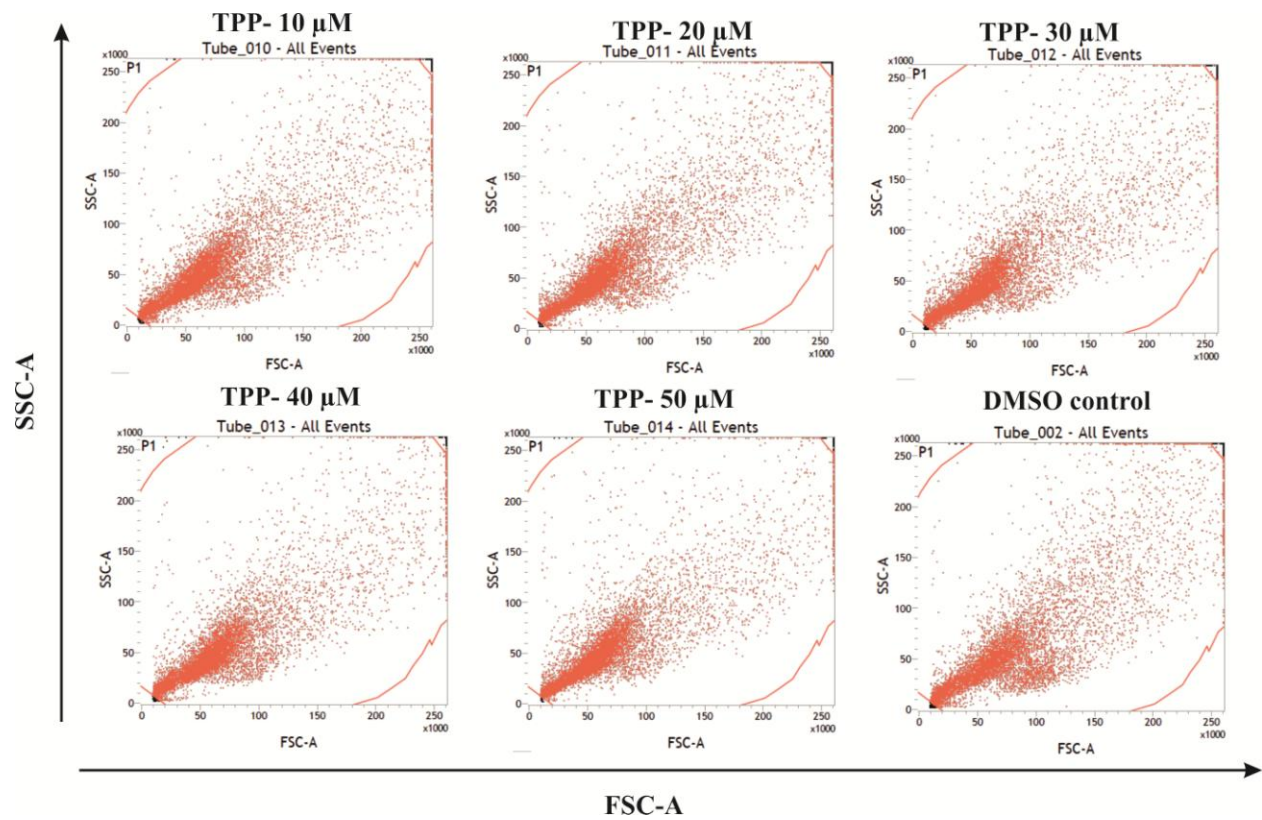

**Figure S16:** The subset of flow cytometric data has been defined through gating over the SSC vs FSC dot plot for the evaluation of apoptosis and necrotic population. The resulting quadrants of the control and treated sets depict the fluorescence properties of the gated population only.

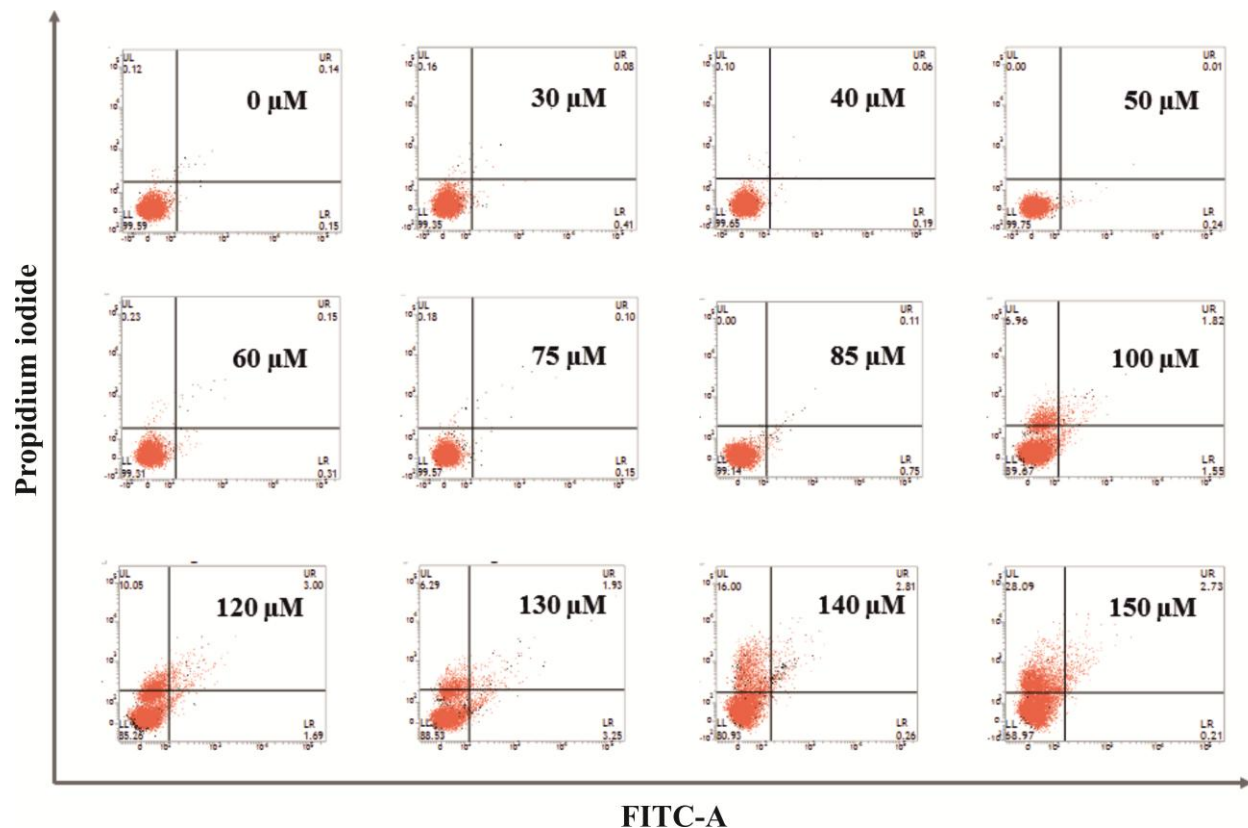

**Figure S17:** TPP does not exhibit cytotoxic effect upon NKE (normal kidney epithelial) cell line: (a) FACS dot plots showing the apoptosis induction in NKE cell line upon treatment with TPP at increasing concentrations upto 150  $\mu\text{M}$ . NKE normal kidney epithelial cells were exemplified from apoptosis induction. A small hike necrotic population is found gradually from 100  $\mu\text{M}$  onwards (6.96%, 10.05%, 6.29%, 16%, and 28.9% at 100, 120, 130, 140 and 150  $\mu\text{M}$  respectively)
